# Supplementary material for: Phase transitions among four BiB3O6 polymorphs: a detailed investigation
Source: Royal Society of Chemistry journal article supplement (doi:10.1039/b903567m), 2009-01-01
Supplement: b903567m.pdf [file b903567m.pdf]

# Phase Transitions among Four BiB<sub>3</sub>O<sub>6</sub> Polymorphs: A Detailed Investigation

Rihong Cong<sup>a</sup>, Jinlong Zhu<sup>b</sup>, Yingxia Wang<sup>a\*</sup>, Tao Yang<sup>a</sup>, Fuhui Liao<sup>a</sup>, Changqing Jin<sup>b\*</sup>, and

Jianhua Lin<sup>a\*</sup>

<sup>a</sup>Beijing National Laboratory for Molecular Sciences, State Key Laboratory of Rare Earth Materials Chemistry and Applications, College of Chemistry and Molecular Engineering, Peking University, Beijing 100871, P. R. China.

<sup>b</sup>Institute of Physics, Chinese Academy of Sciences, P. O. Box 603, Beijing 100080, P. R. China

<sup>a\*</sup>Correspondence authors, Email: jhlin@pku.edu.cn and wangyx@pku.edu.cn; Tel: (8610)62751715, Fax:

(8610)62751708.

<sup>b\*</sup>Correspondence author, Email: jin@aphy.iphy.ac.cn.

## Supporting Information

Figure S1. The structure of four polymorphs of LnB<sub>3</sub>O<sub>6</sub>.

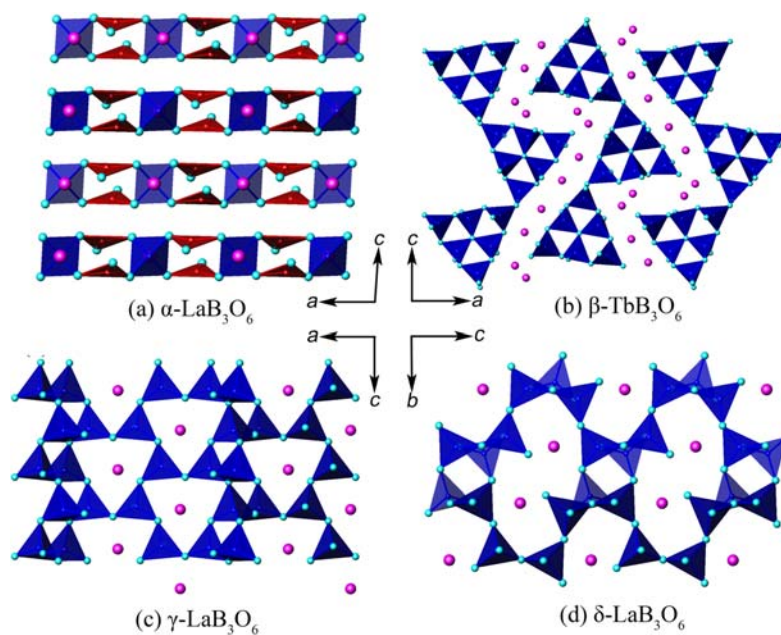

Figure S1. The structure of four polymorphs of LnB<sub>3</sub>O<sub>6</sub>.
